# Supplementary material
Source: publisher figshare collection journal article supplement (https://acs.figshare.com/ndownloader/files/4112425)
Supplement: Supplementary file 1 [file 4112425]

**Supplementary material for “Extension of UNRES force field to treat polypeptide chains with D-amino-acid residues”, A.K. Sieradzan, U.H.E. Hansmann, H.A. Scheraga, A. Liwo.**

**Table S1.** Parameters of Fourier-series fit (eq 11) to the torsional potentials of mean force for all non-reducible potentials.

**Table S2.** Coefficients of the two-dimensional Fourier expansion (eq 12) of the double-torsional potentials of mean force for all non-reducible potentials of the terminally-blocked tripeptide systems.

**Figure S1.** Contour plots of the irreducible double-torsional potentials of mean force of the tripeptide systems considered in this work (126 systems).
